# Supplementary material for: Single cell RNA-sequencing of feline peripheral immune cells with V(D)J repertoire and cross species analysis of T lymphocytes
Source: PubMed Central journal article supplement (PMC11604454; doi:10.3389/fimmu.2024.1438004), 2024-11-15

# Figure S1

A

| Sample/Age | Mean count RNA per cell | Median count RNA per cell | Mean count features per cell | Median count features per cell |
|------------|-------------------------|---------------------------|------------------------------|--------------------------------|
| 6-month    | 4338.813                | 3085.504                  | 1451.185                     | 1355.0                         |
| 1-year     | 3743.530                | 3225.758                  | 1293.321                     | 1225.5                         |
| 4-years    | 2832.122                | 2327.403                  | 1545.825                     | 1417.5                         |
| 9-years    | 3706.864                | 3119.782                  | 1372.430                     | 1525.0                         |

B

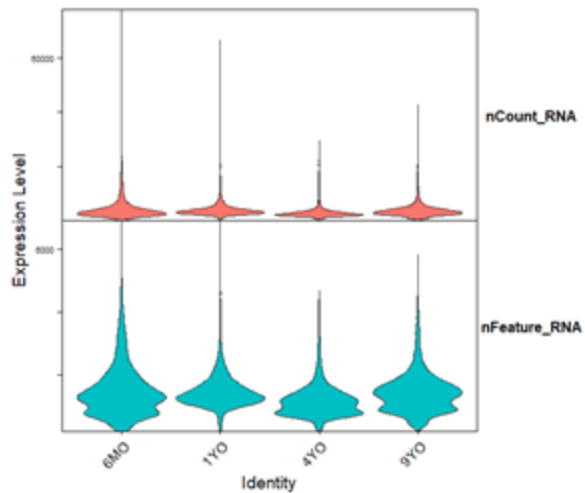

# Figure S2

A

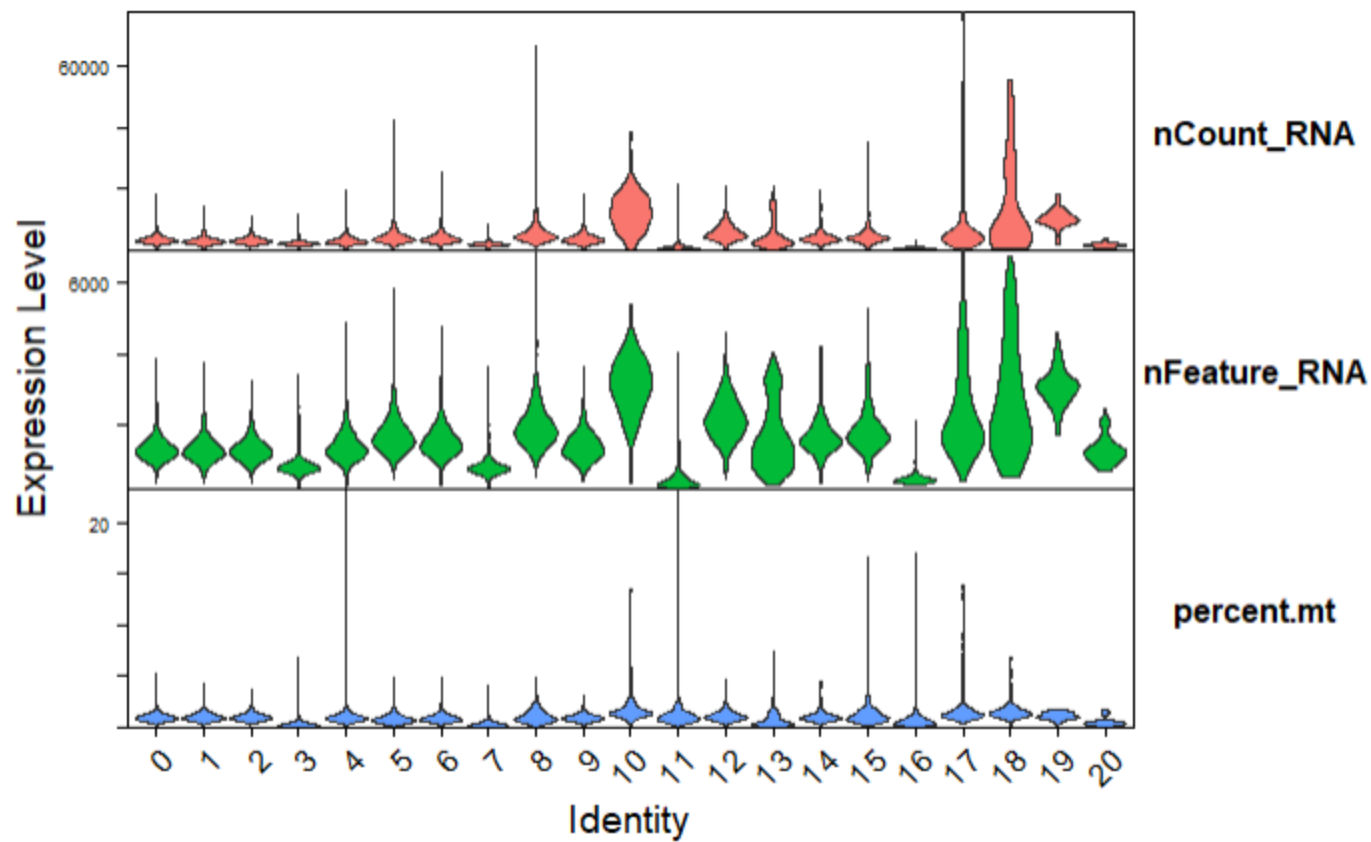

B

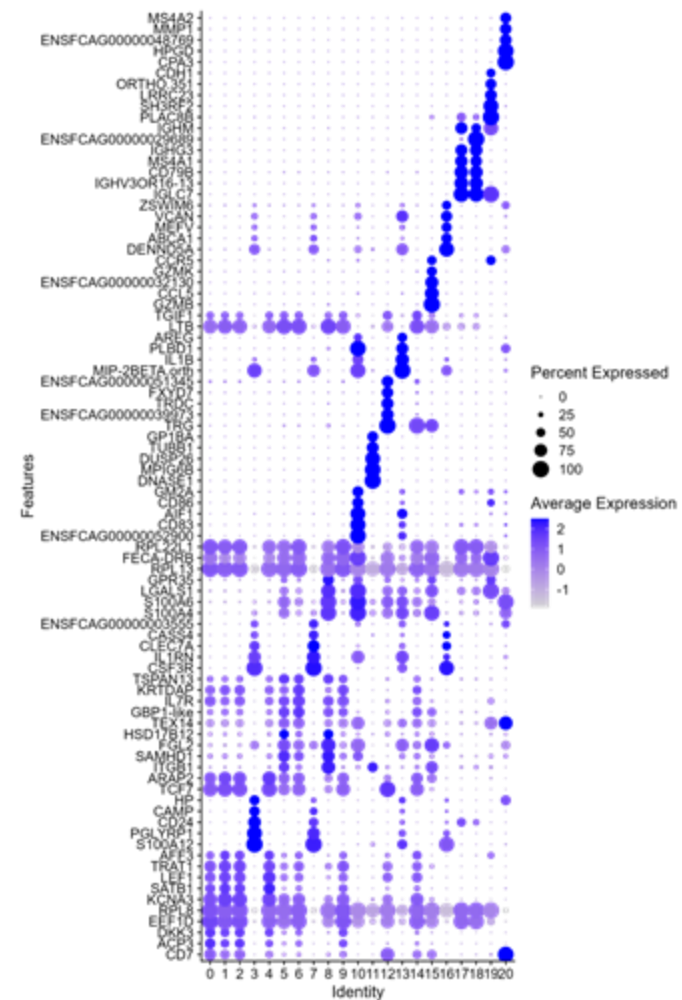

# Figure S3

| Module | Genes                                    |
|--------|------------------------------------------|
| Treg   | <i>IKZF2, FOXP3, IL2RA, CTLA4</i>        |
| Th2    | <i>LGALS3, GATA3, CCR4</i>               |
| Th1    | <i>IL18R1, IL12RB1, TNF, IFNG, TBX21</i> |
| Th17   | <i>RORC, CCR6, KLRB1, IRF4</i>           |

# Figure S4

**A**

|            | <b>C0</b> | <b>C1</b> | <b>C2</b> | <b>C3</b> | <b>C4</b> |
|------------|-----------|-----------|-----------|-----------|-----------|
| <b>6MO</b> | 121       | 82        | 53        | 22        | 12        |
| <b>4YO</b> | 106       | 36        | 13        | 72        | 25        |
| <b>9YO</b> | 399       | 182       | 61        | 28        | 25        |

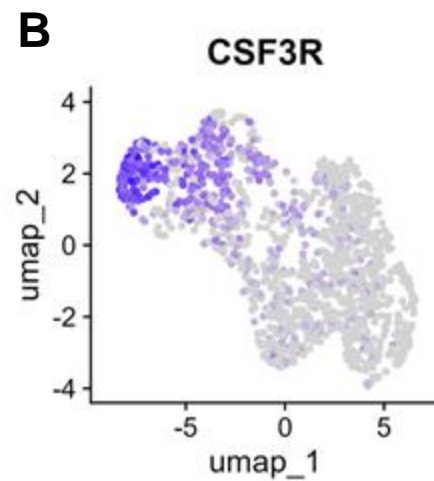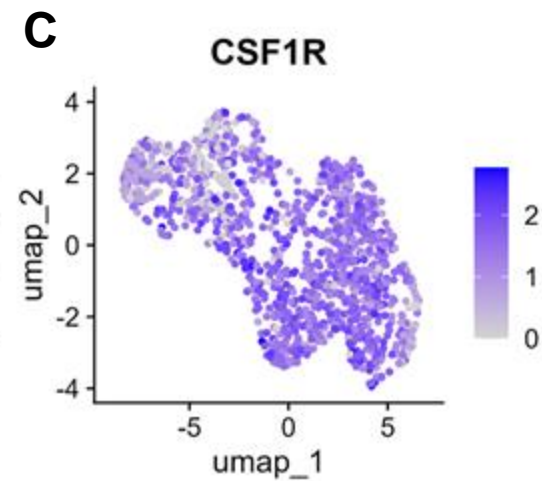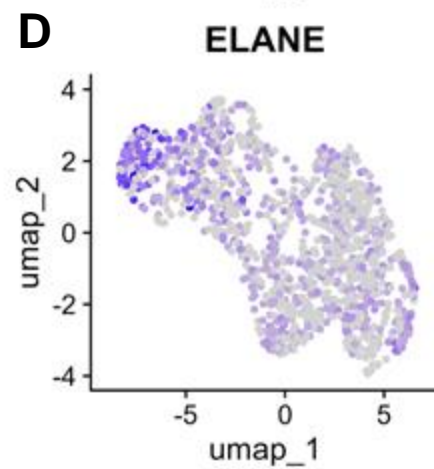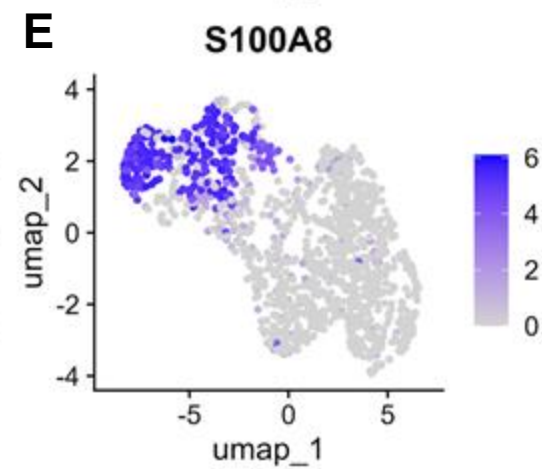

Supplement: Presentation1.pdf [file Presentation1.pdf]
