# Supplementary material for: Single cell RNA-sequencing of feline peripheral immune cells with V(D)J repertoire and cross species analysis of T lymphocytes
Source: PubMed Central journal article supplement (PMC11604454; doi:10.3389/fimmu.2024.1438004), 2024-11-15

# Gating Strategy

## 22-007 presort

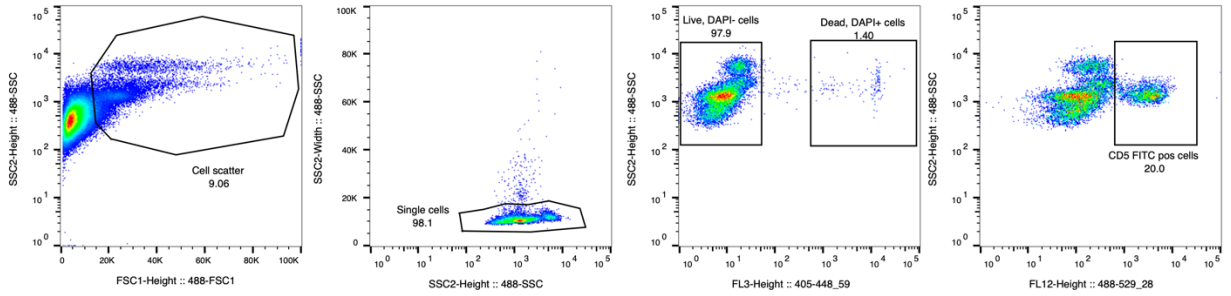

## 21-005 presort

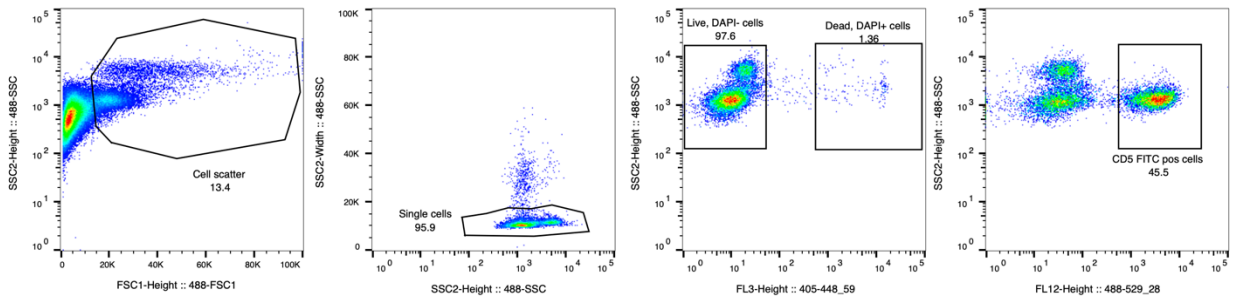

## 18-003 presort

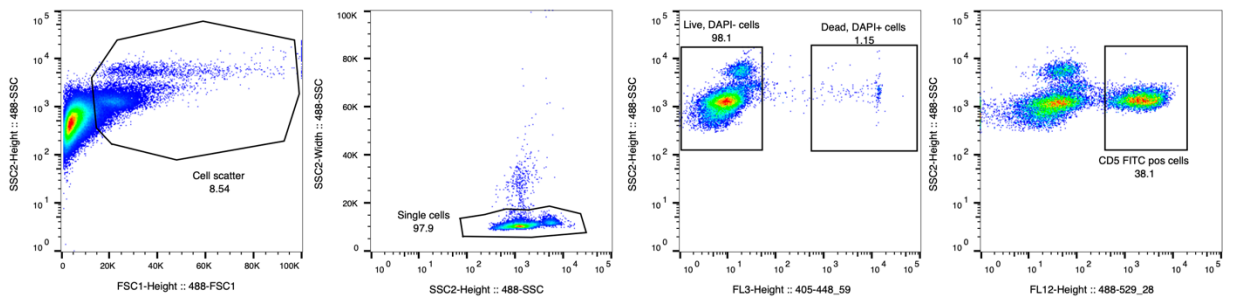

## 13-101 presort

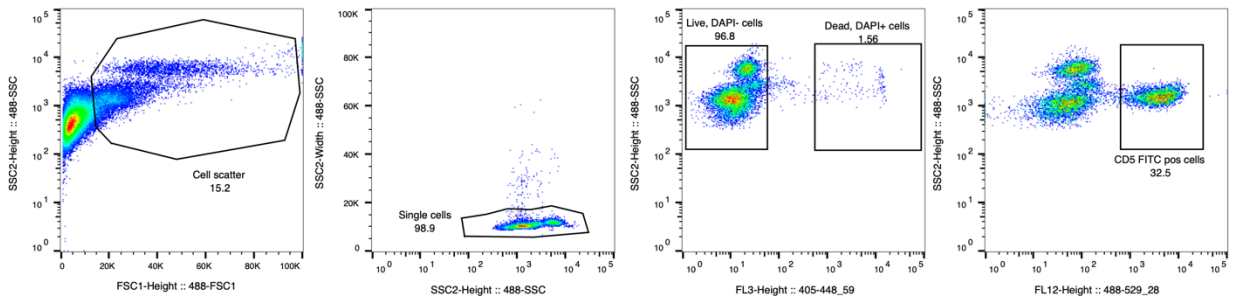

Supplement: Presentation2.pdf [file Presentation2.pdf]
